# Supplementary material
Source: publisher site journal article supplement (https://www.dovepress.com/article/285168)
Supplement: Supplementary file 1 [file get_supplementary_file.php]

**Supplementary material**

**Supplementary Methods**

Cardiovascular risk factors

Hypertension was identified when the systolic or/and diastolic blood pressure were ≥ 140mmHg and 90mmHg, respectively, or/and antihypertensive agents were used. Analyses were performed on fasting blood samples using routine laboratory tests for the determination of lipid, glucose, phosphate, calcium, haemoglobin, albumin, uric acid and ferritin concentrations, transferrin saturation percentages. Intact parathyroid hormone levels were measured by an electrochemiluminescent immunoassay on Roche Cobas. High-sensitive C-reactive protein and vitamin D concentrations were both estimated on Abott Architect using an immunoturbidimetric assay and chemoluminescent microparticle immunoassay, respectively. Dyslipidemia was diagnosed when the total cholesterol: HDL cholesterol ratio was >4 or/and lipid lowering drugs were employed. Diabetes was identified in patients with a fasting glucose level of >7 mmol/l and in those that used glucose lowering medications.

Arterial function

Pulse wave velocity, central aortic blood pressure and reflected and forward wave pressures were evaluated using a high-fidelity SPC-301 micromanometer (Millar instument, Inc., Houston, Texas), interfaced with a computer utilizing SphygmoCor software, version 9.0 (AtCor Medical Pty. Ltd., West Ryde, New South Wales, Australia). Subsequent to resting for 15 minutes in the supine position, arterial waveforms at the radial (dominant arm), carotid and femoral artery pulses were recorded for a time period of ten consecutive waveforms (heart beats). Calibration of the pulse wave was done by manual measurement (auscultation) of brachial BP taken immediately prior to recordings. An extensively validated generalized transfer function incorporated in the SphygmoCor software was used to convert the peripheral pressure wave form into a central aortic waveform1-3. The results were discarded when the systolic or diastolic variability of consecutive waveforms exceeded 5% or the amplitude of the pulse wave signal was less that 80 mV. The aortic pulse wave velocity was calculated as distance in meters divided by transit time in seconds. The time delay in pulse waves between the carotid and femoral sites was assessed by employing an ECG-derived R wave as a fudicial point. Pulse transit time was calculated as the mean of 10 consecutive beats. The difference between the distance from the femoral sampling site to the suprasternal notch and the distance from the carotid sampling site to the suprasternal notch represented the distance the pulse wave travels. Magnitude of the forward and reflected wave components of the aortic pressure waveform was determined by the SphygmoCor software, which separates the aortic waveform by using a modified triangular waveform. Augmentation index was calculated as (second systolic peak/first systolic peak) x 100, reflection magnitude as (reflected wave amplitude/forward wave amplitude) x 100 and pulse pressure amplification as (radial pulse pressure/aortic pulse pressure) x 100. All measurements were made by a single experienced observer who was unaware of the cardiovascular risk factor profiles of the patients. Brachial blood pressure was recorded in all patients. Technically sound measurements of the central pressure wave and pulse wave velocity were obtained in 44 patients each.

Other hemodynamic characteristics

Left ventricular dimensions were determined using two-dimensional directed M-mode echocardiography in the parasternal long axis view. Left ventricular dimensions were determined using two-dimensional directed M-mode echocardiography in the parasternal long axis view. Left ventricular end diastolic and systolic volumes were determined using the Teichholz method4. Stroke volume was determined from the difference between left ventricular end diastolic and systolic volumes as evaluated upon employing the Z-derived method1. Cardiac output was determined as stroke volume x heart rate. Left ventricular mass was determined using a standard formula1 (left ventricular mass=0.8 x (1.04 (left ventricular end diastolic diameter + left ventricular septal wall thickness + left ventricular end diastolic posterior wall thickness)3 – (left ventricular end diastolic diameter)3 + 0.6) and indexed to body surface area. Echocardiographic measurements were made by the same experienced observer that performed the arterial function measurements. The intra-observer variation for echocardiographic measurements is low in our setting5.

**References**

1. Karamanoglu M, O’Rourke MF, Avolio AP, Kelly RP. An analysis of the relationship between central aortic and peripheral upper limb pressure waves in man. Eur Heart J 1993;14:160-167.
2. Pauca AL, O’Rourke MF, Kon ND. Prospective evaluation of a method for estimating ascending aortic pressure from the radial artery pressure wave from. Hypertension 2001;38:932-937.
3. Gallagher D, Adji A, O’Rourke MF. Validation of the transfer function technique for generating central from peripheral upper limb pressure waveform. Am J Hypertens 2004;17:1059-1067.
4. Techholz LE, Kreulen T, Herman MV, Gorlin R. Problems in echocardiographic volume determinations: echocardiographic-angiographic correlations in the presence or absence of asynergy. Am J Cardiol 1976;37:7-11.
5. Mokotedi L, Gunter S, Robinson C, Norton GR, Woodiwiss AJ, Tsang L, Dessein PH, Millen AME. The impact of different classification criteria on the estimated prevalence and associated risk factors of diastolic dysfunction. Int J Rheumatol; 2017;2017:2323410, Article ID 2323410.
